# Supplementary material for: In dividual participant data meta-analysis of trials comparing f r o zen versus f r esh e m bryo transfer strategy (INFORM): a protocol
Source: HighWire-hosted journal article supplement (doi:10.1136/bmjopen-2022-062578), 2022-07-01
Supplement: bmjopen-2022-062578supp001_data_supplement.pdf [file bmjopen-2022-062578supp001_data_supplement.pdf]

## Appendix 1 Search strategy

CENTRAL via the Cochrane Register of Studies Online (CRSO)

- #1 MESH DESCRIPTOR Reproductive Techniques, Assisted EXPLODE ALL TREES
- #2 (assisted reproduct\* techn\*):TI,AB,KY
- #3 embryo\*:TI,AB,KY
- #4 blastocyst\*:TI,AB,KY
- #5 (vitro fertili?ation):TI,AB,KY
- #6 (intracytoplasmic sperm injection\*):TI,AB,KY
- #7 (ivf or icsi):TI,AB,KY
- #8 (ovari\* adj2 stimulation):TI,AB,KY
- #9 (in vitro adj2 maturation\*):TI,AB,KY
- #10 MESH DESCRIPTOR Infertility EXPLODE ALL TREES
- #11 (infertil\* or subfertil\*):TI,AB,KY
- #12 ((elevated or high or raise\* or rise) adj2 progesterone):TI,AB,KY
- #13 MESH DESCRIPTOR Ovarian Hyperstimulation Syndrome EXPLODE ALL TREES
- #14 (ovarian hyperstimulation syndrome):TI,AB,KY
- #15 OHSS:TI,AB,KY
- #16 (implantation failure\*):TI,AB,KY
- #17 ( preimplantation genetic screening):TI,AB,KY
- #18 (high responder\*):TI,AB,KY
- #19 #1 OR #2 OR #3 OR #4 OR #5 OR #6 OR #7 OR #8 OR #9 OR #10 OR #11 OR #12 OR #13  
OR #14 OR #15 OR #16 OR #17 OR #18
- #20 MESH DESCRIPTOR Cryopreservation EXPLODE ALL TREES
- #21 MESH DESCRIPTOR Vitrification EXPLODE ALL TREES
- #22 MESH DESCRIPTOR Freezing EXPLODE ALL TREES
- #23 ((cryopreservat\* or cryofixation or cryonic suspension)):TI,AB,KY
- #24 (freez\* or frozen):TI,AB,KY
- #25 Vitrif\*:TI,AB,KY

- #26 Thaw\*:TI,AB,KY
- #27 (cryopreserv\* or cryofix\* ):TI,AB,KY
- #28 cryonic :TI,AB,KY
- #29 #20 OR #21 OR #22 OR #23 OR #24 OR #25 OR #26 OR #27 OR #28
- #30 #19 AND #29

## Appendix 2 Variable list

| Variable                         | Variable type | Notes                            |
|----------------------------------|---------------|----------------------------------|
| <b>IDs</b>                       |               |                                  |
| Centre ID                        |               | For multi-centre trials only     |
| <b>Randomisation</b>             |               |                                  |
| Randomisation                    | Categorical   | Frozen/fresh                     |
| Date of randomisation            | Continuous    | DD-MM-YYYY                       |
| <b>Demographics/baseline</b>     |               |                                  |
| Female age                       | Continuous    | In years                         |
| Ethnicity                        | Categorical   |                                  |
| Duration of infertility          | Continuous    | In months                        |
| Type of infertility              | Categorical   | Primary/secondary                |
| Female BMI                       | Continuous    | Kg/m <sup>2</sup>                |
|                                  | Continuous    |                                  |
|                                  | Or            |                                  |
| Menstrual cycle                  | categorical   | Days Or regular/irregular        |
| Cause of infertility:            | Categorical   | Yes/no for each cause            |
| 1 Ovulatory                      | Categorical   |                                  |
| 2 Tubal                          | Categorical   |                                  |
| 3 Male                           | Categorical   |                                  |
| 4 Unexplained                    | Categorical   |                                  |
| 5 Endometriosis                  | Categorical   |                                  |
| PCOS/WHO II anovulation          | Categorical   | Yes/no                           |
| Smoker                           | Categorical   | Current/past/never smoker        |
| IVF cycle number                 | Continuous    | 1/2/3/...                        |
| Baseline AMH levels              | Continuous    | Ng/ml (1ng/ml= 7.1429pmol/L)     |
| Baseline antral follicle count   | Continuous    |                                  |
| <b>Ovarian stimulation</b>       |               |                                  |
| Ovarian stimulation protocol     | Categorical   | Long/short/ultrashort/antagonist |
| Total dose of gonadotrophins     | Continuous    | IU                               |
| Trigger                          | Categorical   | Agonist/hCG/dual trigger         |
| Progesterone level on day of HCG | Continuous    | ng/ml (1ng/ml=3.18 nmol/L)       |
| <b>Oocyte collection</b>         |               |                                  |
| Number of oocytes collected      | Continuous    |                                  |
| Date of oocyte collection        | Continuous    | DD-MM-YYYY                       |
| <b>Fertilisation</b>             |               |                                  |
| Insemination method              | Categorical   | IVF/ICSI/split                   |
| Number of 2PN                    | Continuous    |                                  |

|                                         |             |                                                                                                                                                                                                                                         |
|-----------------------------------------|-------------|-----------------------------------------------------------------------------------------------------------------------------------------------------------------------------------------------------------------------------------------|
| Number of good quality embryos          | Continuous  | defined by ACE/BFS scoring- 6 to 8 cells minimum on day 3                                                                                                                                                                               |
| <b>Embryo transfer</b>                  |             |                                                                                                                                                                                                                                         |
| Actual intervention received            | Categorical | Fresh/frozen                                                                                                                                                                                                                            |
| Date of embryo transfer                 | Continuous  | YY-MM-YYYY                                                                                                                                                                                                                              |
| Stage of embryo transfer                | Categorical | cleavage or blastocyst                                                                                                                                                                                                                  |
| Number of embryo transferred            | Continuous  | 0/1/2/3                                                                                                                                                                                                                                 |
| Quality of each transferred embryo      | Categorical | Embryo quality                                                                                                                                                                                                                          |
| Endometrial thickness on the day of hCG | Continuous  | mm (or on the last USG prior to ET for the frozen group)                                                                                                                                                                                |
| Endometrial pattern                     | Categorical | trilaminar, opaque, not measured                                                                                                                                                                                                        |
| <b>Embryo freezing</b>                  |             |                                                                                                                                                                                                                                         |
| Number of spare embryos frozen          | Continuous  | For the fresh group only                                                                                                                                                                                                                |
| Number of embryos frozen                | Continuous  | For the frozen group only                                                                                                                                                                                                               |
| Stage of freezing                       | Categorical | cleavage or blastocyst                                                                                                                                                                                                                  |
| Method of freezing                      | Categorical | Vitrification/slow freezing                                                                                                                                                                                                             |
| Endometrial preparation                 | Categorical | For the frozen group only, natural/modified/HRT-short/HRT-long                                                                                                                                                                          |
| Number of embryos thawed                | Continuous  |                                                                                                                                                                                                                                         |
| Luteal support (progesterone type)      | Categorical | No/IM/Oral/Vaginal/Dydrogesterone/Mixed/Other                                                                                                                                                                                           |
| Does of progesterone per day            | Continuous  |                                                                                                                                                                                                                                         |
| Duration of progesterone                | Continuous  | Days                                                                                                                                                                                                                                    |
| Additional notes                        | String      |                                                                                                                                                                                                                                         |
| <b>Fertility outcomes</b>               |             |                                                                                                                                                                                                                                         |
| Live birth                              | Categorical | Yes/no                                                                                                                                                                                                                                  |
| Healthy baby                            | Categorical | Yes/no (defined as term (>37 weeks) singleton live birth with appropriate weight for gestation. Appropriate weight will be determined by plotting weight against the gestational age on the standardised ethnicity-based growth charts) |
| Pregnancy                               | Categorical | Yes/no (hCG positive)                                                                                                                                                                                                                   |
| Clinical pregnancy                      | Categorical | Yes/no (Viable pregnancy confirmed by ultrasound)                                                                                                                                                                                       |
| Pregnancy loss:                         | Categorical | Yes/no                                                                                                                                                                                                                                  |
| - ectopic pregnancy                     | Categorical | Yes/no                                                                                                                                                                                                                                  |
| - miscarriage                           | Categorical | Yes/no                                                                                                                                                                                                                                  |
| - stillbirth                            | Categorical | Yes/no                                                                                                                                                                                                                                  |
| - termination of pregnancy              | Categorical | Yes/no                                                                                                                                                                                                                                  |
| Multiple pregnancy:                     | Categorical | Yes/no                                                                                                                                                                                                                                  |
| Twin                                    | Categorical | Yes/no                                                                                                                                                                                                                                  |

|                                                                                 |             |                                                                                 |
|---------------------------------------------------------------------------------|-------------|---------------------------------------------------------------------------------|
| High-order (triplet or more)                                                    | Categorical | Yes/no                                                                          |
| Gestational age at delivery                                                     | Continuous  | Days (or x weeks + y days)                                                      |
| <b>Obstetric outcomes</b>                                                       |             |                                                                                 |
| Hypertensive disorders of pregnancy                                             | Categorical | Yes/no (comprising pregnancy induced hypertension, pre-eclampsia and eclampsia) |
| - preeclampsia                                                                  | Categorical | Yes/no                                                                          |
| Antepartum haemorrhage                                                          | Categorical | Yes/no                                                                          |
| - placenta praevia                                                              | Categorical | Yes/no                                                                          |
| - placenta accrete                                                              | Categorical | Yes/no                                                                          |
| - unexplained                                                                   | Categorical | Yes/no                                                                          |
| Postpartum haemorrhage                                                          | Categorical | Yes/no                                                                          |
| <b>Other maternal safety outcomes:</b>                                          |             |                                                                                 |
| OHSS                                                                            | Categorical | No/mild/moderate/severe (RCOG green top guidance)                               |
| <b>Neonatal outcomes#</b>                                                       |             |                                                                                 |
| Birthweight                                                                     | Continuous  | Grams                                                                           |
| Neonatal mortality                                                              | Categorical | Yes/no                                                                          |
| Major congenital anomaly                                                        | Categorical | Yes/no                                                                          |
| - if yes, specify                                                               |             | Detailed description                                                            |
| Admission to neonatal intensive care unit                                       | Categorical | Yes/no                                                                          |
| <b>Cumulative outcomes (till the first live delivery)*</b>                      |             |                                                                                 |
| Cumulative live birth                                                           | Categorical | Yes/no                                                                          |
| Date of the last embryo transfer or the embryo transfer resulting in live birth | Continuous  | DD-MM-YYYY                                                                      |
| <b>Follow up</b>                                                                |             |                                                                                 |
| Withdrew consent                                                                | Categorical | Categorical                                                                     |
| - if yes, date                                                                  | Continuous  | DD-MM-YYYY                                                                      |
| Loss to follow up                                                               | Categorical | Categorical                                                                     |
| - if yes, date                                                                  | Continuous  | DD-MM-YYYY                                                                      |

Footnotes: #For multiple birth, neonatal outcomes will be collected for each infant separately.
